# Supplementary material for: Theoretically investigating the ability of phenanthroline derivatives to separate transuranic elements and their bonding properties
Source: Royal Society of Chemistry journal article supplement (doi:10.1039/d2nj02160a), 2022-01-01
Supplement: d2nj02160a1.pdf [file d2nj02160a1.pdf]

## Theoretically Investigating the Ability of Phenanthroline Derivatives to Separate Transuranic Elements and their Bonding Properties

Yiying Zhang, Shouqiang Wu, Anyong Li

### Supporting information

**Table S1.** The calculated  $S^2$  of the ground state for the complexes  $AnL(NO_3)_3$  complexes at the BP86/6-31G(d)/RECP level of theory.

| complex                        | $S^2$ | $S(S+1)$ |
|--------------------------------|-------|----------|
| $NpL_{\text{triazol}}(NO_3)_3$ | 6.02  | 6.00     |
| $PuL_{\text{triazol}}(NO_3)_3$ | 8.80  | 8.75     |
| $AmL_{\text{triazol}}(NO_3)_3$ | 12.09 | 12.00    |
| $CmL_{\text{triazol}}(NO_3)_3$ | 15.76 | 15.75    |
| $NpL_{\text{pyrazol}}(NO_3)_3$ | 6.02  | 6.00     |
| $PuL_{\text{pyrazol}}(NO_3)_3$ | 8.80  | 8.75     |
| $AmL_{\text{pyrazol}}(NO_3)_3$ | 12.09 | 12.00    |
| $CmL_{\text{pyrazol}}(NO_3)_3$ | 15.76 | 15.75    |
| $NpL_{\text{pyrrol}}(NO_3)_3$  | 6.02  | 6.00     |
| $PuL_{\text{pyrrol}}(NO_3)_3$  | 8.80  | 8.75     |
| $AmL_{\text{pyrrol}}(NO_3)_3$  | 12.09 | 12.00    |
| $CmL_{\text{pyrrol}}(NO_3)_3$  | 15.76 | 15.75    |

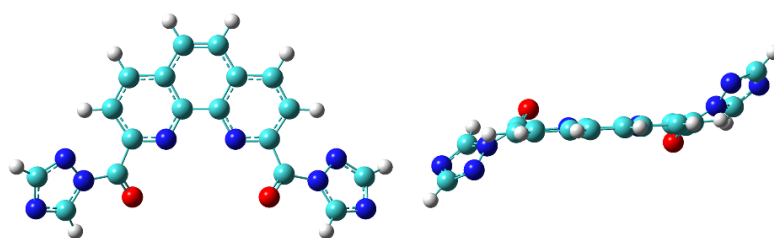

conformer 1 ( $\Delta E = 0.00$ )

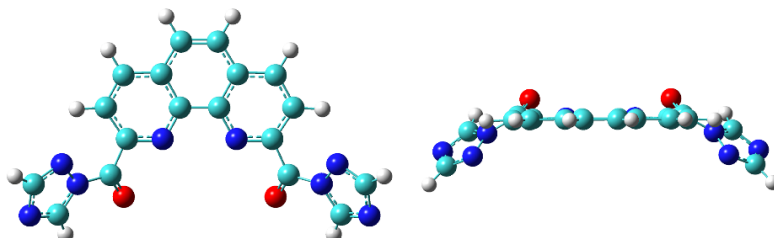

conformer 2 ( $\Delta E = 0.18$ )

**Fig. S1** Optimized structures of the ligand  $L_{\text{triazol}}$  in different conformers and the relative energies ( $\Delta E$ , kcal/mol) at BP86/6-31G(d)/RECP level in the gas phase. Light blue, dark blue, red, and white colors denote C, N, O, and H atoms, respectively.

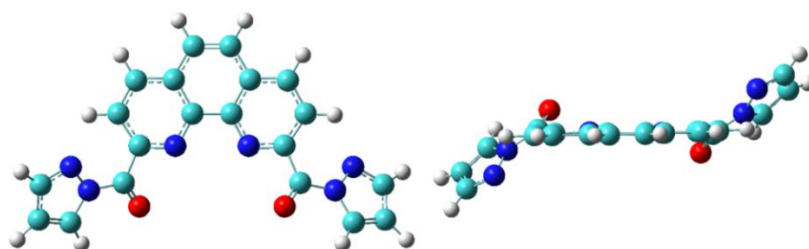

conformer 1 ( $\Delta E = 0.00$ )

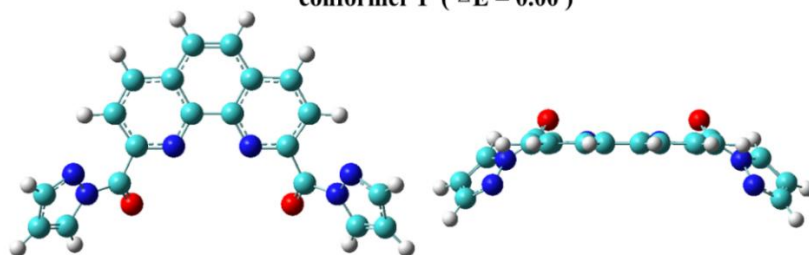

conformer 2 ( $\Delta E = 0.17$ )

**Fig. S2** Optimized structures of the ligand  $L_{\text{pyrazol}}$  in different conformers and the relative energies ( $\Delta E$ , kcal/mol) at BP86/6-31G(d)/RECP level in the gas phase. Light blue, dark blue, red, and white colors denote N, O, C, and H atoms, respectively.

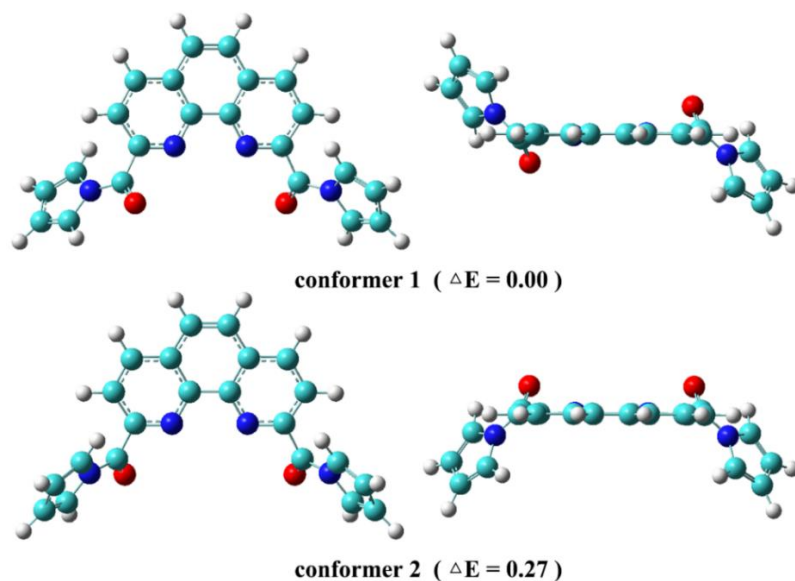

**Fig. S3** Optimized structures of the ligand  $L_{\text{pyrrol}}$  in different conformers and the relative energies ( $\Delta E$ , kcal/mol) at BP86/6-31G(d)/RECP level in the gas phase. Light blue, dark blue, red, and white colors denote N, O, C, and H atoms, respectively.

**Table S2.** The relative energies ( $\Delta E$ , kcal/mol) of conformer 2 compared to conformer 1 of the ligand L ( $L = L_{\text{triazol}}$ ,  $L_{\text{pyrazol}}$  and  $L_{\text{pyrrol}}$ ) at BP86/6-31G(d)/RECP level in the n-dodecane and cyclohexanone phase.

| complex              | $\Delta E$ (n-dodecane) | $\Delta E$ (cyclohexanone) |
|----------------------|-------------------------|----------------------------|
| $L_{\text{triazol}}$ | 0.13                    | 0.08                       |
| $L_{\text{pyrazol}}$ | 0.11                    | 0.05                       |
| $L_{\text{pyrrol}}$  | 0.18                    | 0.06                       |

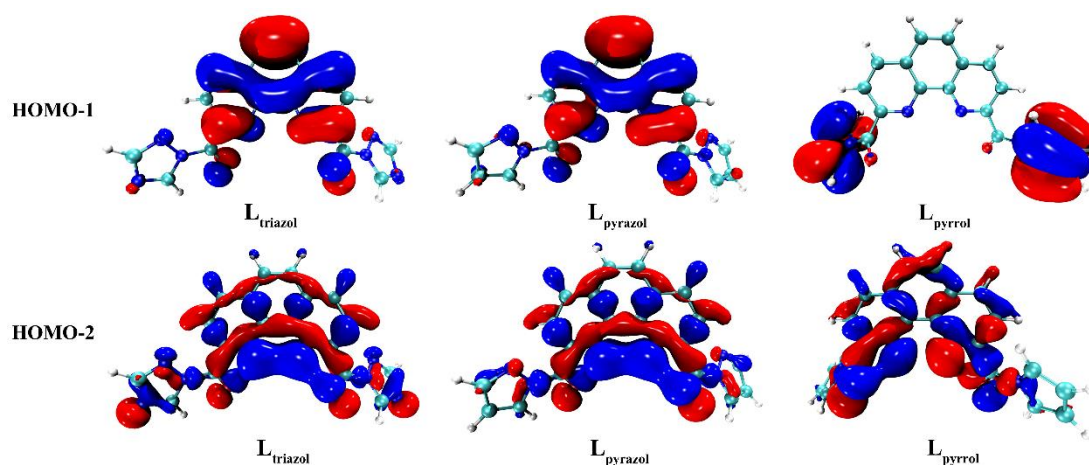

**Fig. S4** The diagrams of the frontier MOs of the ligands  $L_{\text{triazol}}$ ,  $L_{\text{pyrazol}}$  and  $L_{\text{pyrrol}}$  obtained at the BP86/6-31G(d)/RECP level of theory in the gas phase. (The isosurface value is set as 0.02 a.u.)

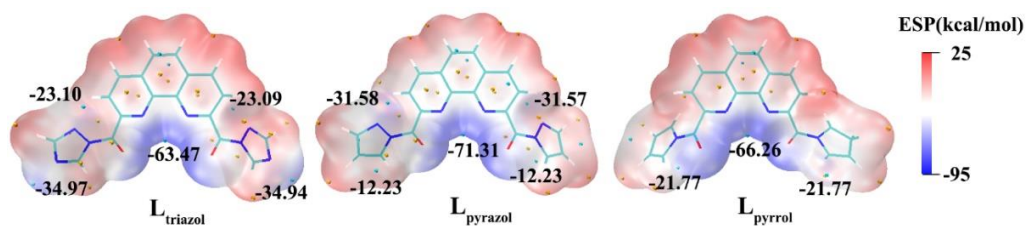

**Fig. S5** ESP plots of the optimized ligands  $L_{\text{triazol}}$ ,  $L_{\text{pyrazol}}$  and  $L_{\text{pyrrol}}$  in the n-dodecane organic phase.

**Table S3.** Calculated average natural atomic charges on the N and O atoms of ligands  $L_{\text{triazol}}$ ,  $L_{\text{pyrazol}}$  and  $L_{\text{pyrrol}}$  in the n-dodecane organic phase.

| charge         | $L_{\text{triazol}}$ | $L_{\text{pyrazol}}$ | $L_{\text{pyrrol}}$ |
|----------------|----------------------|----------------------|---------------------|
| Q <sub>N</sub> | -0.374               | -0.379               | -0.381              |
| Q <sub>O</sub> | -0.495               | -0.511               | -0.518              |

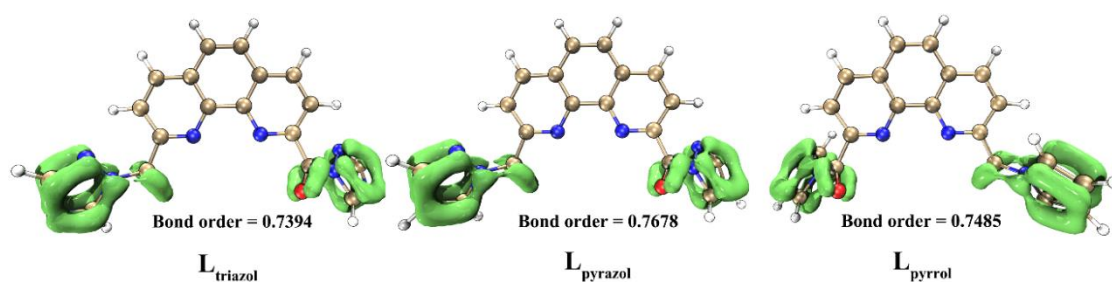

**Fig. S6** The 3D-plots of LOL-pi of the five-membered ring and the carbonyl group in the optimized ligands  $L_{\text{triazol}}$ ,  $L_{\text{pyrazol}}$  and  $L_{\text{pyrrol}}$  in the gas phase. (The isosurface value is set as 0.04 a.u.)

**Table S4.** Average An-N(L), An-O(L) and An-O(NO<sub>3</sub><sup>-</sup>) bond lengths (Å) of the complexes AnL(NO<sub>3</sub>)<sub>3</sub> at BP86/6-31G(d)/RECP level of theory in the gas phase.

| <b>complex</b>                                         | <b>An-N(L)</b> | <b>An-O(L)</b> | <b>An-O(NO<sub>3</sub><sup>-</sup>)</b> |
|--------------------------------------------------------|----------------|----------------|-----------------------------------------|
| NpL <sub>triazol</sub> (NO <sub>3</sub> ) <sub>3</sub> | 2.561          | 2.403          | 2.450                                   |
| PuL <sub>triazol</sub> (NO <sub>3</sub> ) <sub>3</sub> | 2.589          | 2.430          | 2.451                                   |
| AmL <sub>triazol</sub> (NO <sub>3</sub> ) <sub>3</sub> | 2.640          | 2.487          | 2.466                                   |
| CmL <sub>triazol</sub> (NO <sub>3</sub> ) <sub>3</sub> | 2.789          | 2.536          | 2.474                                   |
| NpL <sub>pyrazol</sub> (NO <sub>3</sub> ) <sub>3</sub> | 2.558          | 2.396          | 2.456                                   |
| PuL <sub>pyrazol</sub> (NO <sub>3</sub> ) <sub>3</sub> | 2.588          | 2.422          | 2.458                                   |
| AmL <sub>pyrazol</sub> (NO <sub>3</sub> ) <sub>3</sub> | 2.639          | 2.480          | 2.472                                   |
| CmL <sub>pyrazol</sub> (NO <sub>3</sub> ) <sub>3</sub> | 2.782          | 2.521          | 2.480                                   |
| NpL <sub>pyrrol</sub> (NO <sub>3</sub> ) <sub>3</sub>  | 2.583          | 2.419          | 2.454                                   |
| PuL <sub>pyrrol</sub> (NO <sub>3</sub> ) <sub>3</sub>  | 2.596          | 2.442          | 2.455                                   |
| AmL <sub>pyrrol</sub> (NO <sub>3</sub> ) <sub>3</sub>  | 2.652          | 2.516          | 2.470                                   |
| CmL <sub>pyrrol</sub> (NO <sub>3</sub> ) <sub>3</sub>  | 2.775          | 2.576          | 2.477                                   |

**Table S5.** The charges of substituents on the amide group in the ligand L before and after coordination with actinide ion.

| <b>complex</b>       | <b>q<sub>monomer</sub></b> | <b>q<sub>complex</sub></b> | <b>Δq</b> |
|----------------------|----------------------------|----------------------------|-----------|
| L <sub>triazol</sub> | -0.4042                    | -0.2607                    | 0.1435    |
| L <sub>pyrazol</sub> | -0.3463                    | -0.1885                    | 0.1578    |
| L <sub>pyrrol</sub>  | -0.2751                    | -0.1328                    | 0.1423    |

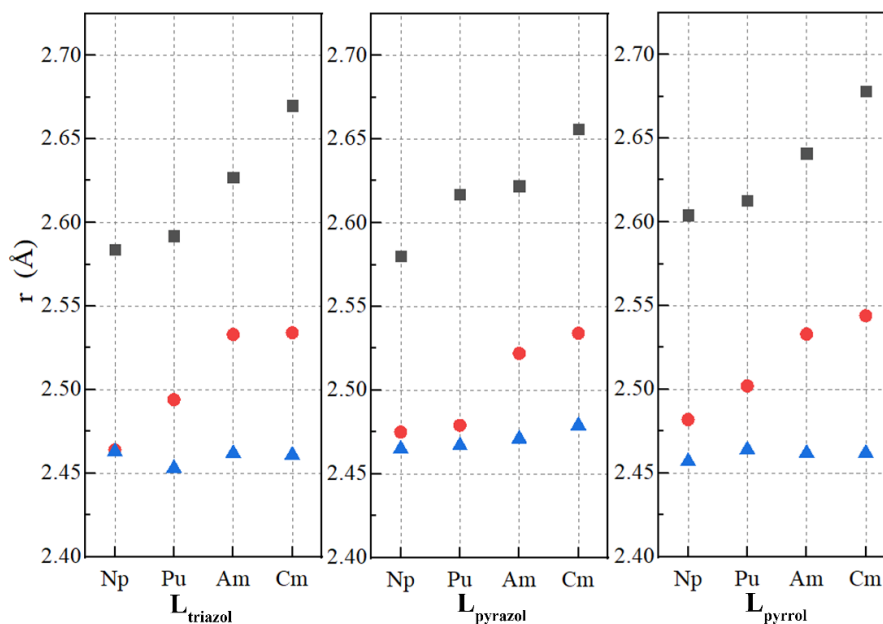

**Fig. S7** Average An-N(L), An-O(L) and An-O(NO<sub>3</sub><sup>-</sup>) bond lengths (Å) of the complexes [AnL<sub>2</sub>(NO<sub>3</sub>)<sup>2+</sup> at BP86/6-31G(d)/RECP level of theory in the gas phase. Given distances are An-N(L) (■), An-O(L) (●) and An-O(NO<sub>3</sub><sup>-</sup>) (▲).

**Table S6.** Average An-N(L), An-O(L) and An-O(NO<sub>3</sub><sup>-</sup>) bond lengths (Å) of the complexes [AnL<sub>2</sub>(NO<sub>3</sub>)<sup>2+</sup> at BP86/6-31G(d)/RECP level of theory in the gas phase.

| complex                                                                  | An-N(L) | An-O(L) | An-O(NO <sub>3</sub> <sup>-</sup> ) |
|--------------------------------------------------------------------------|---------|---------|-------------------------------------|
| [Np(L <sub>triazol</sub> ) <sub>2</sub> (NO <sub>3</sub> ) <sup>2+</sup> | 2.584   | 2.464   | 2.463                               |
| [Pu(L <sub>triazol</sub> ) <sub>2</sub> (NO <sub>3</sub> ) <sup>2+</sup> | 2.592   | 2.494   | 2.453                               |
| [Am(L <sub>triazol</sub> ) <sub>2</sub> (NO <sub>3</sub> ) <sup>2+</sup> | 2.627   | 2.533   | 2.462                               |
| [Cm(L <sub>triazol</sub> ) <sub>2</sub> (NO <sub>3</sub> ) <sup>2+</sup> | 2.670   | 2.534   | 2.461                               |
| [Np(L <sub>pyrazol</sub> ) <sub>2</sub> (NO <sub>3</sub> ) <sup>2+</sup> | 2.580   | 2.475   | 2.465                               |
| [Pu(L <sub>pyrazol</sub> ) <sub>2</sub> (NO <sub>3</sub> ) <sup>2+</sup> | 2.617   | 2.479   | 2.467                               |
| [Am(L <sub>pyrazol</sub> ) <sub>2</sub> (NO <sub>3</sub> ) <sup>2+</sup> | 2.622   | 2.522   | 2.471                               |
| [Cm(L <sub>pyrazol</sub> ) <sub>2</sub> (NO <sub>3</sub> ) <sup>2+</sup> | 2.656   | 2.534   | 2.479                               |
| [Np(L <sub>pyrrol</sub> ) <sub>2</sub> (NO <sub>3</sub> ) <sup>2+</sup>  | 2.604   | 2.482   | 2.457                               |
| [Pu(L <sub>pyrrol</sub> ) <sub>2</sub> (NO <sub>3</sub> ) <sup>2+</sup>  | 2.613   | 2.502   | 2.464                               |
| [Am(L <sub>pyrrol</sub> ) <sub>2</sub> (NO <sub>3</sub> ) <sup>2+</sup>  | 2.641   | 2.533   | 2.462                               |
| [Cm(L <sub>pyrrol</sub> ) <sub>2</sub> (NO <sub>3</sub> ) <sup>2+</sup>  | 2.678   | 2.544   | 2.462                               |

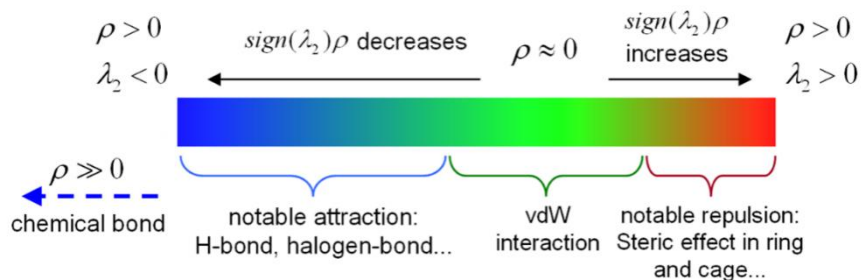

**Fig. S8** Standard coloring method and chemical interpretation of  $sign(\lambda_2)\rho$  on IRI isosurfaces (a.u.).

**Table S7.** The second-order stabilization energy ( $E_{ij}^{(2)}$ , kcal mol<sup>-1</sup>) between the donor natural bond orbital  $i$  (NBO( $i$ )) and acceptor orbital  $j$  (NBO( $j$ )) in the complexes AnL<sub>pyrazol</sub>(NO<sub>3</sub>)<sub>3</sub> of  $\beta$  spin.  $T_{fds}$  is the sum of  $5f$ ,  $6d$  and  $7s$ ,  $T_{NO}$  is the sum of O and N donor atoms on the complexes.<sup>a</sup>

| complexes                                              | NBO( $i$ ) → NBO( $j$ )      | $E_{ij}^{(2)}$       | $T_{fds}$ | $T_{NO}$ |
|--------------------------------------------------------|------------------------------|----------------------|-----------|----------|
| NpL <sub>pyrazol</sub> (NO <sub>3</sub> ) <sub>3</sub> | LP(N)→LP*(Np <sup>3+</sup> ) | 31.96 / 0.49 / 12.83 | 45.28     | 117.00   |
|                                                        | LP(O)→LP*(Np <sup>3+</sup> ) | 49.40 / 1.07 / 21.25 | 71.72     |          |
| PuL <sub>pyrazol</sub> (NO <sub>3</sub> ) <sub>3</sub> | LP(N)→LP*(Pu <sup>3+</sup> ) | 6.52 / 1.29 / 19.57  | 27.38     | 92.35    |
|                                                        | LP(O)→LP*(Pu <sup>3+</sup> ) | 27.30 / 1.98 / 35.69 | 64.97     |          |
| AmL <sub>pyrazol</sub> (NO <sub>3</sub> ) <sub>3</sub> | LP(N)→LP*(Am <sup>3+</sup> ) | 4.62 / 2.21 / 11.83  | 18.66     | 45.54    |
|                                                        | LP(O)→LP*(Am <sup>3+</sup> ) | 7.48 / 2.71 / 16.69  | 26.88     |          |
| CmL <sub>pyrazol</sub> (NO <sub>3</sub> ) <sub>3</sub> | LP(N)→LP*(Cm <sup>3+</sup> ) | 2.22 / 1.98 / 9.95   | 14.15     | 33.50    |
|                                                        | LP(O)→LP*(Cm <sup>3+</sup> ) | 4.07 / 1.79 / 13.49  | 19.35     |          |

<sup>a</sup>... /... /... represents the results of  $5f$ ,  $6d$  and  $7s$ , respectively.

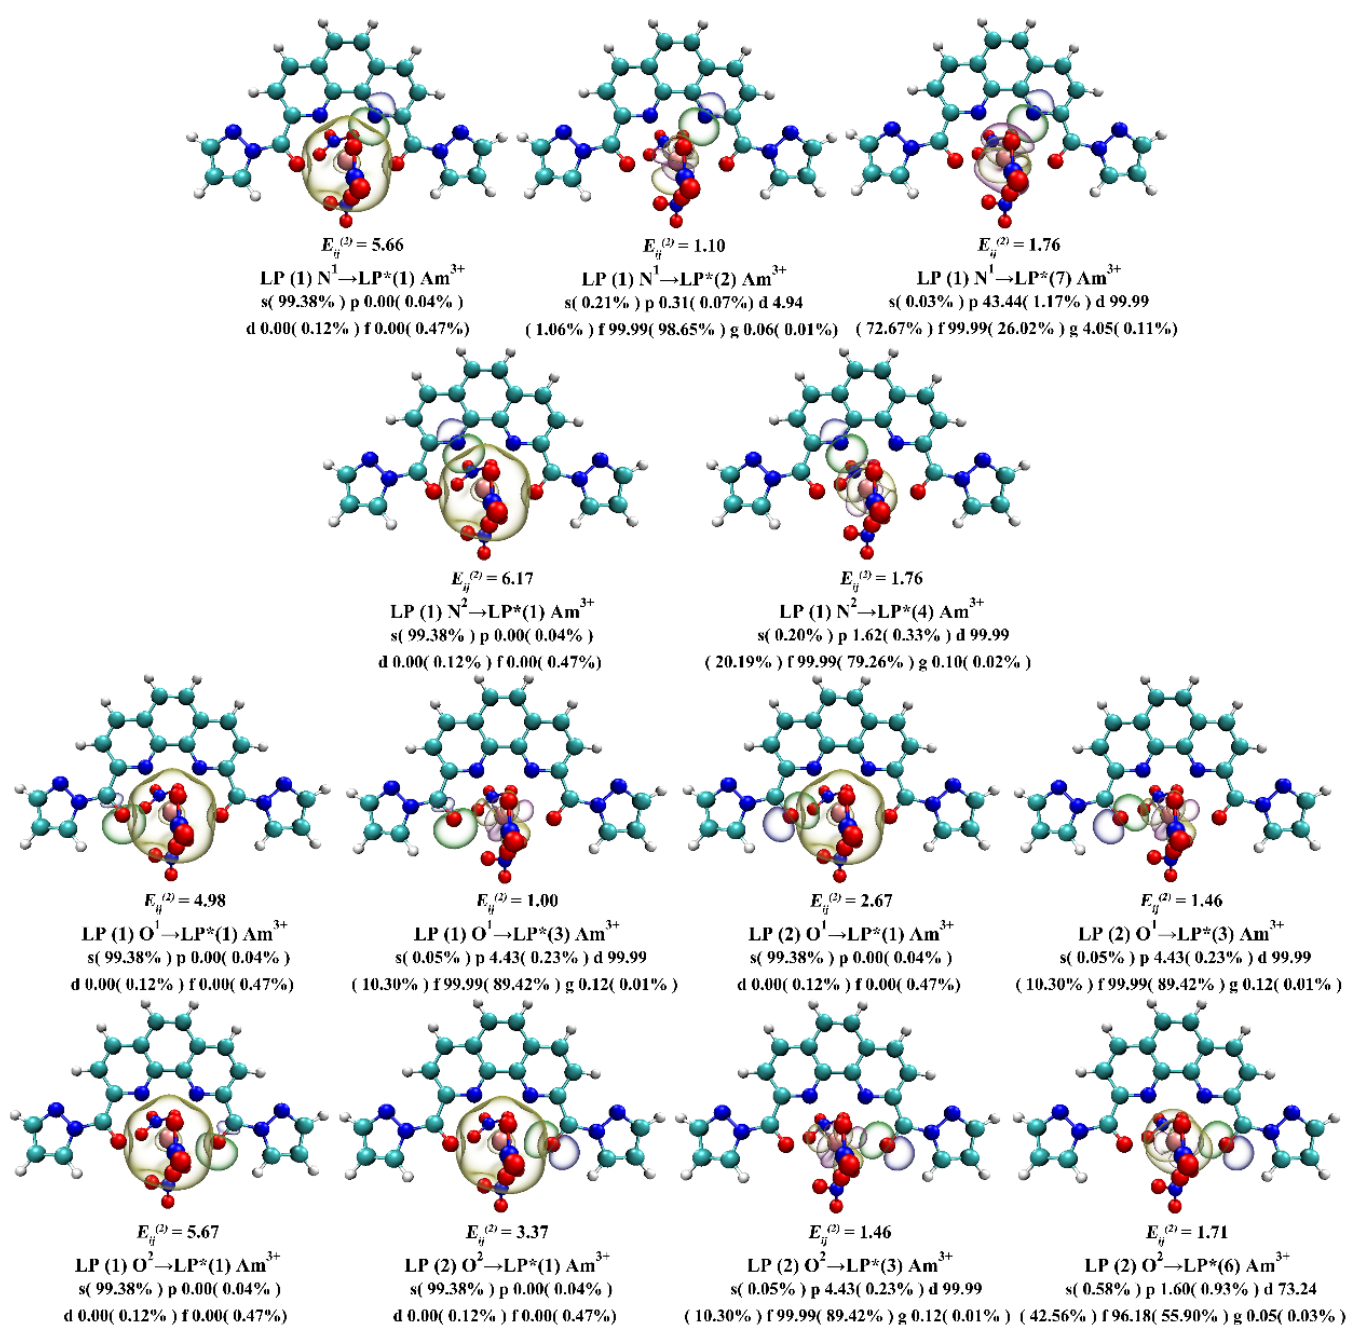

**Fig. S9** The interaction between the donor natural bond orbital  $i$  (NBO( $i$ )) and acceptor orbital  $j$  (NBO( $j$ )) of the  $\beta$  spin in the complexes  $\text{AmL}_{\text{pyrazol}}(\text{NO}_3)_3$ .



**Table S8.** Calculated metal-ligand binding energies ( $\Delta G_{BE}$ , kcal/mol) for the complexes  $AnL(NO_3)_3$  in the gas phase, n-dodecane and cyclohexanone organic phases, and water phase at the PBE0/6-311g(d,p)/RECP level of theory.

| complex                        | gas       | n-dodecane | cyclohexanone | water    |
|--------------------------------|-----------|------------|---------------|----------|
| $NpL_{\text{triazol}}(NO_3)_3$ | -1074.800 | -588.086   | -157.291      | -114.011 |
| $PuL_{\text{triazol}}(NO_3)_3$ | -1056.782 | -573.871   | -146.206      | -103.107 |
| $AmL_{\text{triazol}}(NO_3)_3$ | -1062.100 | -576.180   | -144.473      | -100.800 |
| $CmL_{\text{triazol}}(NO_3)_3$ | -1060.665 | -566.886   | -128.687      | -84.289  |
| $NpL_{\text{pyrazol}}(NO_3)_3$ | -1089.537 | -590.283   | -160.076      | -116.799 |
| $PuL_{\text{pyrazol}}(NO_3)_3$ | -1075.349 | -577.354   | -149.643      | -106.493 |
| $AmL_{\text{pyrazol}}(NO_3)_3$ | -1066.040 | -579.889   | -147.687      | -103.940 |
| $CmL_{\text{pyrazol}}(NO_3)_3$ | -1064.417 | -570.499   | -131.936      | -87.469  |
| $NpL_{\text{pyrrol}}(NO_3)_3$  | -1083.081 | -584.393   | -157.528      | -114.909 |
| $PuL_{\text{pyrrol}}(NO_3)_3$  | -1069.903 | -572.485   | -147.077      | -104.262 |
| $AmL_{\text{pyrrol}}(NO_3)_3$  | -1060.608 | -576.086   | -145.652      | -102.149 |
| $CmL_{\text{pyrrol}}(NO_3)_3$  | -1058.838 | -566.566   | -129.881      | -85.709  |

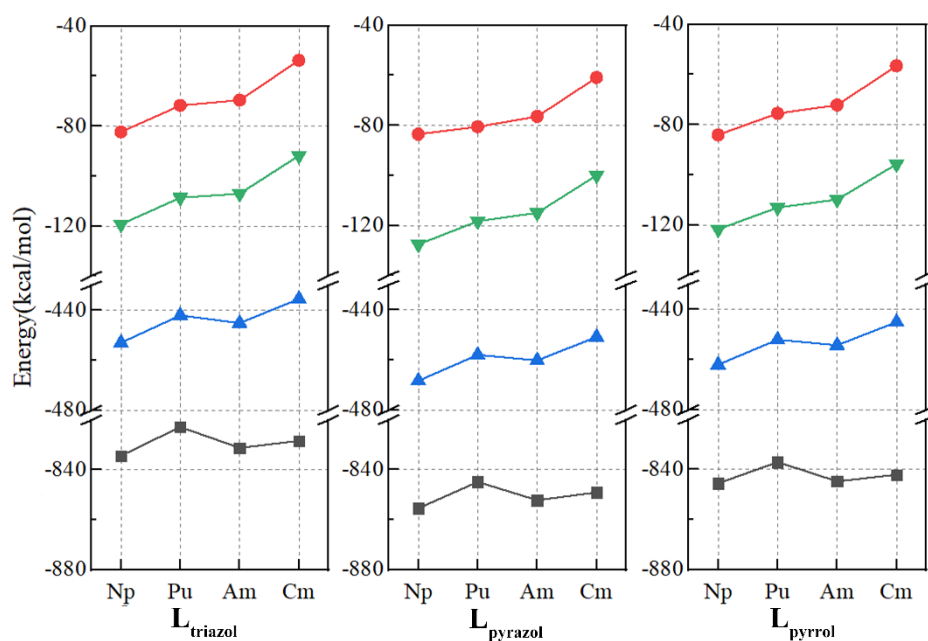

**Fig. S10** Metal-ligand binding energy of  $[AnL_2(NO_3)]^{2+}$  in the gas (■), n-dodecane (▲), cyclohexanone (▼) and water (●).

**Table S9.** Calculated metal-ligand binding energies ( $\Delta G_{BE}$ , kcal/mol) for the complexes  $[AnL_2(NO_3)]^{2+}$  in the gas phase, n-dodecane and cyclohexanone organic phases, and water phase at the PBE0/6-311g(d,p)/RECp level of theory.

| <b>complex</b>                          | <b>gas</b> | <b>n-dodecane</b> | <b>cyclohexanone</b> | <b>water</b> |
|-----------------------------------------|------------|-------------------|----------------------|--------------|
| $[Np(L_{\text{triazol}})_2(NO_3)]^{2+}$ | -834.369   | -452.937          | -119.325             | -82.352      |
| $[Pu(L_{\text{triazol}})_2(NO_3)]^{2+}$ | -822.857   | -442.001          | -108.676             | -71.787      |
| $[Am(L_{\text{triazol}})_2(NO_3)]^{2+}$ | -831.261   | -445.104          | -107.044             | -69.600      |
| $[Cm(L_{\text{triazol}})_2(NO_3)]^{2+}$ | -828.373   | -435.421          | -91.847              | -53.743      |
| $[Np(L_{\text{pyrazol}})_2(NO_3)]^{2+}$ | -855.445   | -468.311          | -127.575             | -83.535      |
| $[Pu(L_{\text{pyrazol}})_2(NO_3)]^{2+}$ | -844.915   | -457.924          | -118.319             | -80.566      |
| $[Am(L_{\text{pyrazol}})_2(NO_3)]^{2+}$ | -852.205   | -460.132          | -114.936             | -76.461      |
| $[Cm(L_{\text{pyrazol}})_2(NO_3)]^{2+}$ | -849.114   | -450.776          | -100.015             | -60.892      |
| $[Np(L_{\text{pyrrol}})_2(NO_3)]^{2+}$  | -845.561   | -462.023          | -121.810             | -84.118      |
| $[Pu(L_{\text{pyrrol}})_2(NO_3)]^{2+}$  | -837.102   | -452.004          | -113.101             | -75.516      |
| $[Am(L_{\text{pyrrol}})_2(NO_3)]^{2+}$  | -844.777   | -454.247          | -109.924             | -72.188      |
| $[Cm(L_{\text{pyrrol}})_2(NO_3)]^{2+}$  | -842.153   | -445.013          | -95.813              | -56.590      |

**Table S10.** Changes in Gibbs free energies ( $\Delta G$ , kcal/mol) for the complexes  $AnL(NO_3)_3$  in the gas phase at the BP86 functional with 6-31G(d), 6-311G(d,p) basis set, respectively. <sup>a</sup>

| <b>complex</b> | <b>6-31G(d)</b>                | <b>6-311G(d,p)</b>             |
|----------------|--------------------------------|--------------------------------|
| $NpL(NO_3)_3$  | -560.137 / -562.974 / -558.075 | -569.745 / -571.515 / -565.197 |
| $PuL(NO_3)_3$  | -554.772 / -557.915 / -552.760 | -563.576 / -565.646 / -559.074 |
| $AmL(NO_3)_3$  | -546.018 / -549.666 / -544.806 | -555.821 / -558.331 / -552.131 |
| $CmL(NO_3)_3$  | -537.293 / -541.757 / -536.881 | -547.263 / -550.442 / -544.193 |

<sup>a</sup> .../.../... represents the results of the complexes of  $L_{\text{triazol}}$ ,  $L_{\text{pyrazol}}$  and  $L_{\text{pyrrol}}$ , respectively.

**Table S11.** Changes in Gibbs free energies ( $\Delta G$ , kcal/mol) for the complexes  $An(NO_3)_3$  in the n-dodecane, cyclohexanone, and water at the BP86/6-31G(d)/RECP level of theory.

| complex                        | n-dodecane | cyclohexanone | water   |
|--------------------------------|------------|---------------|---------|
| $NpL_{\text{triazol}}(NO_3)_3$ | -310.668   | -95.923       | -70.434 |
| $PuL_{\text{triazol}}(NO_3)_3$ | -305.294   | -91.798       | -67.449 |
| $AmL_{\text{triazol}}(NO_3)_3$ | -297.642   | -86.072       | -61.211 |
| $CmL_{\text{triazol}}(NO_3)_3$ | -288.550   | -79.759       | -56.184 |
| $NpL_{\text{pyrazol}}(NO_3)_3$ | -313.754   | -98.454       | -72.935 |
| $PuL_{\text{pyrazol}}(NO_3)_3$ | -308.509   | -94.706       | -70.284 |
| $AmL_{\text{pyrazol}}(NO_3)_3$ | -301.285   | -89.964       | -65.055 |
| $CmL_{\text{pyrazol}}(NO_3)_3$ | -292.974   | -83.786       | -60.109 |
| $NpL_{\text{pyrrol}}(NO_3)_3$  | -308.799   | -96.303       | -70.853 |
| $PuL_{\text{pyrrol}}(NO_3)_3$  | -304.264   | -92.242       | -68.085 |
| $AmL_{\text{pyrrol}}(NO_3)_3$  | -297.567   | -87.766       | -63.074 |
| $CmL_{\text{pyrrol}}(NO_3)_3$  | -288.982   | -81.714       | -58.233 |

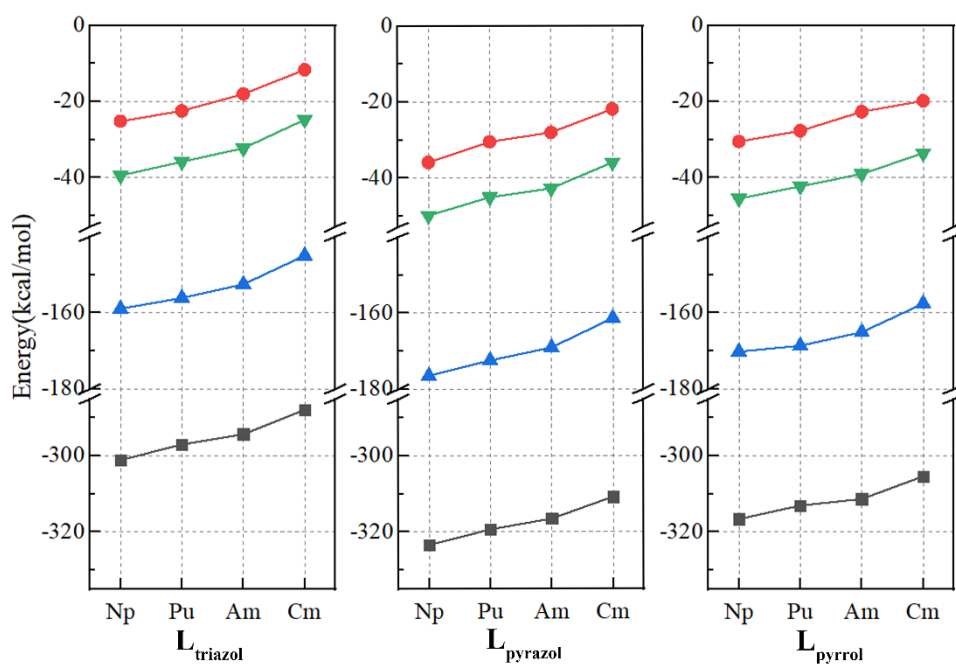

**Fig. S11** Changes in Gibbs free energies of  $[AnL_2(NO_3)_2]^{2+}$  in the gas ( $\blacksquare$ ), n-dodecane ( $\blacktriangle$ ), cyclohexanone ( $\blacktriangledown$ ) and water ( $\bullet$ ).

**Table S12.** Changes in Gibbs free energies ( $\Delta G$ , kcal/mol) for the complexes  $[\text{AnL}_2(\text{NO}_3)]^{2+}$  in the gas, n-dodecane, cyclohexanone, and water phases at the BP86/6-31G(d)/RECP level of theory.

| complex                                                      | gas      | n-dodecane | cyclohexanone | water   |
|--------------------------------------------------------------|----------|------------|---------------|---------|
| $[\text{Np}(\text{L}_{\text{triazol}})_2(\text{NO}_3)]^{2+}$ | -301.112 | -158.882   | -39.447       | -25.198 |
| $[\text{Pu}(\text{L}_{\text{triazol}})_2(\text{NO}_3)]^{2+}$ | -296.992 | -156.084   | -35.871       | -22.480 |
| $[\text{Am}(\text{L}_{\text{triazol}})_2(\text{NO}_3)]^{2+}$ | -294.321 | -152.470   | -32.298       | -18.042 |
| $[\text{Cm}(\text{L}_{\text{triazol}})_2(\text{NO}_3)]^{2+}$ | -287.922 | -144.928   | -24.803       | -11.663 |
| $[\text{Np}(\text{L}_{\text{pyrazol}})_2(\text{NO}_3)]^{2+}$ | -323.423 | -176.477   | -49.891       | -35.910 |
| $[\text{Pu}(\text{L}_{\text{pyrazol}})_2(\text{NO}_3)]^{2+}$ | -319.361 | -172.472   | -45.075       | -30.473 |
| $[\text{Am}(\text{L}_{\text{pyrazol}})_2(\text{NO}_3)]^{2+}$ | -316.552 | -169.096   | -42.797       | -28.058 |
| $[\text{Cm}(\text{L}_{\text{pyrazol}})_2(\text{NO}_3)]^{2+}$ | -310.790 | -161.386   | -35.992       | -21.922 |
| $[\text{Np}(\text{L}_{\text{pyrrol}})_2(\text{NO}_3)]^{2+}$  | -316.620 | -170.195   | -45.531       | -30.535 |
| $[\text{Pu}(\text{L}_{\text{pyrrol}})_2(\text{NO}_3)]^{2+}$  | -313.049 | -168.638   | -42.296       | -27.735 |
| $[\text{Am}(\text{L}_{\text{pyrrol}})_2(\text{NO}_3)]^{2+}$  | -311.330 | -165.053   | -39.062       | -22.690 |
| $[\text{Cm}(\text{L}_{\text{pyrrol}})_2(\text{NO}_3)]^{2+}$  | -305.378 | -157.572   | -33.599       | -19.825 |

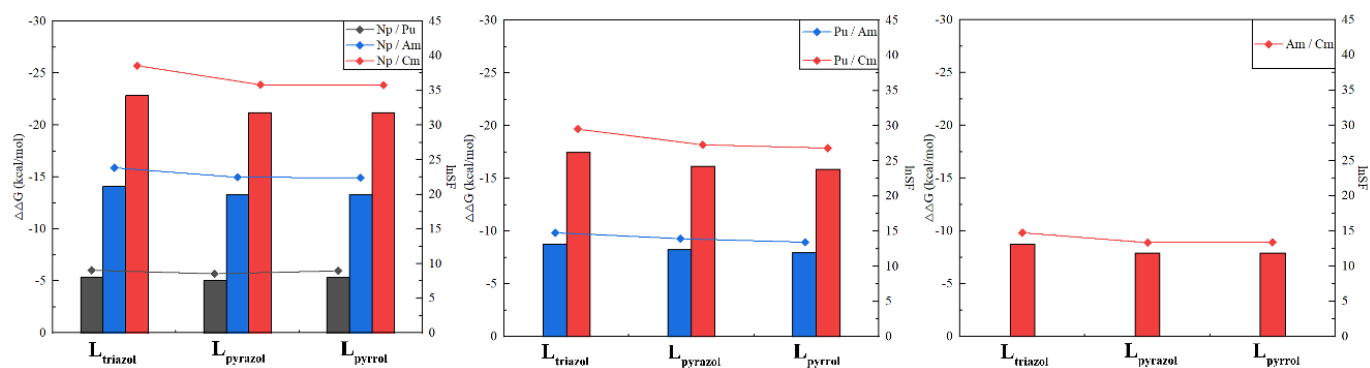

**Fig. 12** The differences of  $\Delta G$  ( $\Delta\Delta G$ , kcal/mol) and  $\ln\text{SF}$  of ligands  $\text{L}_{\text{triazol}}$ ,  $\text{L}_{\text{pyrazol}}$  and  $\text{L}_{\text{pyrrol}}$  in the gas phase. The black, blue, and red bars represent the values of  $\Delta\Delta G$  for the separation of actinides from Pu, Am, and Cm, respectively. The lines represent  $\ln\text{SF}$  values respectively.

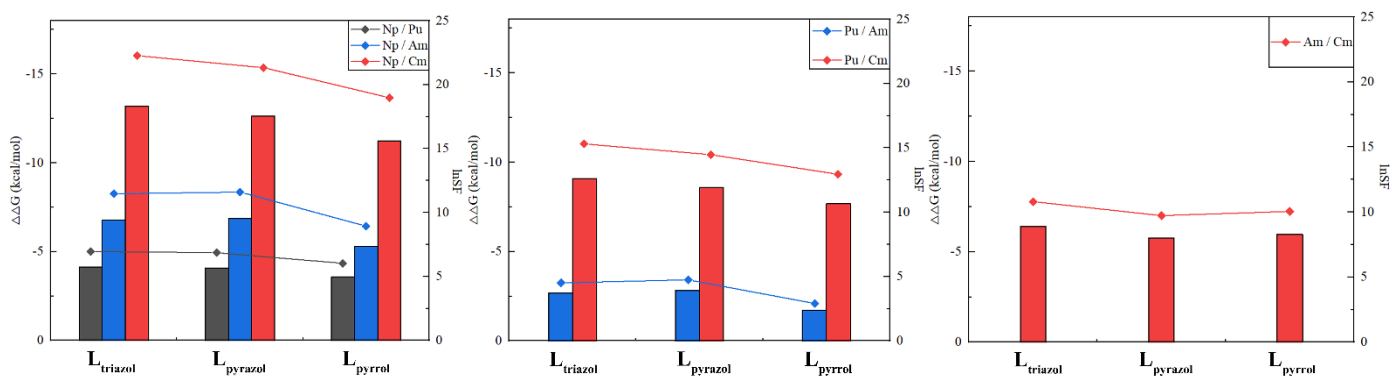

**Fig. S13** The differences of  $\Delta G$  ( $\Delta\Delta G$ , kcal/mol) and  $\ln SF$  of ligands  $L_{\text{triazol}}$ ,  $L_{\text{pyrazol}}$  and  $L_{\text{pyrrol}}$  in the gas phase. The black, blue, and red bars represent the values of  $\Delta\Delta G$  for the separation of actinides from Pu, Am, and Cm, respectively. The lines represent  $\ln SF$  values respectively.

**Table S13.** Changes in Gibbs free energies ( $\Delta G$ , kcal/mol) for the complexes  $\text{Eu}L(\text{NO}_3)_3$  ( $L = L_{\text{triazol}}$ ,  $L_{\text{pyrazol}}$  and  $L_{\text{pyrrol}}$ ) in the gas, n-dodecane, cyclohexanone, and water phases at the BP86/6-31G(d)/RECP level of theory.

| complex                                      | gas      | n-dodecane | cyclohexanone | water   |
|----------------------------------------------|----------|------------|---------------|---------|
| $\text{Eu}L_{\text{triazol}}(\text{NO}_3)_3$ | -545.018 | -297.898   | -86.522       | -60.729 |
| $\text{Eu}L_{\text{pyrazol}}(\text{NO}_3)_3$ | -549.106 | -302.182   | -90.082       | -62.966 |
| $\text{Eu}L_{\text{pyrrol}}(\text{NO}_3)_3$  | -544.949 | -298.532   | -87.910       | -62.631 |

**Table S14.** The differences of  $\Delta G$  ( $\Delta\Delta G$ , kcal/mol) with the reactions of the complexes  $\text{ML}(\text{NO}_3)_3$  ( $M = \text{Np}$ ,  $\text{Pu}$ ,  $\text{Am}$ ,  $\text{Cm}$ ,  $\text{Eu}$ ) in the gas phase at the theoretical level of PBE0 and BP86, respectively. <sup>a</sup>

| $\Delta\Delta G$                | PBE0                  | BP86                     |
|---------------------------------|-----------------------|--------------------------|
| $\Delta\Delta G_{\text{Np/Pu}}$ | -2.08 / -0.71 / -0.29 | -5.36 / -5.06 / -5.32    |
| $\Delta\Delta G_{\text{Np/Am}}$ | -5.05 / -3.53 / -2.62 | -14.12 / -13.31 / -13.27 |
| $\Delta\Delta G_{\text{Np/Cm}}$ | -7.16 / -5.69 / -5.61 | -22.84 / -21.22 / -21.19 |
| $\Delta\Delta G_{\text{Pu/Am}}$ | -2.97 / -2.82 / -2.33 | -8.75 / -8.25 / -7.95    |
| $\Delta\Delta G_{\text{Pu/Cm}}$ | -5.07 / -4.98 / -5.32 | -17.48 / -16.16 / -15.88 |
| $\Delta\Delta G_{\text{Am/Cm}}$ | -2.10 / -2.16 / -2.99 | -8.73 / -7.91 / -7.93    |
| $\Delta\Delta G_{\text{Np/Eu}}$ | -3.58 / -3.23 / -3.03 | -15.12 / -13.87 / -13.13 |
| $\Delta\Delta G_{\text{Pu/Eu}}$ | -1.49 / -2.52 / -2.74 | -9.75 / -8.81 / -7.81    |
| $\Delta\Delta G_{\text{Eu/Am}}$ | -1.47 / -0.30 / 0.41  | 1.00 / 0.56 / 0.14       |
| $\Delta\Delta G_{\text{Eu/Cm}}$ | -3.58 / -2.46 / -2.58 | -7.73 / -7.35 / -8.07    |

<sup>a</sup> .../.../... represents the results of the complexes of  $L_{\text{triazol}}$ ,  $L_{\text{pyrazol}}$  and  $L_{\text{pyrrol}}$ , respectively.

## Cartesian Coordinates

### NpL<sub>pyrazol</sub>(NO<sub>3</sub>)<sub>3</sub>

|   |             |             |             |
|---|-------------|-------------|-------------|
| C | -3.44290400 | 2.55413100  | 0.10686700  |
| C | -2.80355300 | 3.77529500  | -0.03831800 |
| C | -1.38116500 | 3.84276600  | -0.08462700 |
| C | -0.67540900 | 2.59649100  | -0.02227600 |
| C | -2.66155600 | 1.36644600  | 0.17882700  |
| C | -0.63921100 | 5.06101700  | -0.17717700 |
| C | 0.77555200  | 2.59622400  | -0.01644700 |
| C | 1.48451800  | 3.84092900  | -0.08712100 |
| C | 0.74550300  | 5.06007800  | -0.17940400 |
| C | 2.90701700  | 3.76849300  | -0.05200100 |
| H | 3.49438400  | 4.69167100  | -0.11080900 |
| C | 3.54486800  | 2.54424400  | 0.06355000  |
| C | 2.75828300  | 1.35789300  | 0.13700300  |
| H | -1.18988800 | 6.00626100  | -0.23870100 |
| H | -4.52846500 | 2.46891900  | 0.17621900  |
| H | -3.38872800 | 4.69978700  | -0.09776900 |
| H | 1.29722500  | 6.00451000  | -0.24416500 |
| H | 4.63142700  | 2.45443300  | 0.10093900  |
| N | 1.39725400  | 1.40168700  | 0.08395900  |
| N | -1.30130000 | 1.39998200  | 0.07214700  |
| C | 3.22492100  | -0.02562300 | 0.27668600  |
| C | -3.12899300 | -0.00600000 | 0.42174900  |
| O | -2.28562400 | -0.93793000 | 0.55108400  |
| O | 2.37237700  | -0.96487900 | 0.36048200  |
| N | 4.57391300  | -0.40316000 | 0.32205600  |
| C | 5.01230500  | -1.71856700 | 0.42176700  |
| C | 6.70942200  | -0.27770000 | 0.33838600  |
| C | 6.38957900  | -1.66750200 | 0.43413000  |
| H | 4.29842300  | -2.53716000 | 0.46565700  |
| H | 7.69433600  | 0.19183000  | 0.31676700  |
| H | 7.07634400  | -2.50964800 | 0.49981000  |
| N | -4.48100800 | -0.36527600 | 0.53785100  |
| C | -4.92062100 | -1.66959300 | 0.72846300  |
| C | -6.29611200 | -1.60804800 | 0.79291100  |
| H | -4.20741100 | -2.48837200 | 0.78576500  |
| C | -6.61289800 | -0.22351400 | 0.63206800  |
| H | -6.98390500 | -2.44047500 | 0.93144600  |
| H | -7.59563000 | 0.25108800  | 0.62311000  |
| N | -5.52660500 | 0.53444300  | 0.47724000  |
| N | 5.62338400  | 0.49316100  | 0.26975600  |

|    |             |             |             |
|----|-------------|-------------|-------------|
| N  | 0.03245400  | -3.39757800 | -1.30192900 |
| O  | -0.84554200 | -3.06741800 | -0.41191200 |
| O  | 0.90420700  | -2.44942800 | -1.57331700 |
| O  | 0.06765200  | -4.48724400 | -1.84816400 |
| N  | -0.63627200 | -0.05093500 | -2.81411600 |
| O  | -1.42352500 | -0.77146500 | -2.07606400 |
| O  | 0.42282100  | 0.39215800  | -2.18141800 |
| O  | -0.85901200 | 0.20907000  | -3.98502500 |
| N  | 0.18046200  | -1.07305400 | 2.81787600  |
| O  | 0.13046800  | 0.09952900  | 2.24748300  |
| O  | 0.13517900  | -2.07433300 | 1.98414400  |
| O  | 0.26065800  | -1.21880800 | 4.02754800  |
| Np | 0.03646600  | -0.76781200 | -0.06958200 |

**PuL**pyrazol(NO<sub>3</sub>)<sub>3</sub>

|   |             |             |             |
|---|-------------|-------------|-------------|
| C | 3.34960500  | 2.64858300  | -0.39751000 |
| C | 2.68679100  | 3.85057300  | -0.27495000 |
| C | 1.28826100  | 3.87574800  | -0.15446300 |
| C | 0.61389300  | 2.62875600  | -0.14932200 |
| C | 2.59171100  | 1.46560500  | -0.39278400 |
| C | 0.54292500  | 5.09256200  | -0.04675200 |
| C | -0.83195600 | 2.60936800  | -0.04545200 |
| C | -1.53264200 | 3.83886600  | 0.03834000  |
| C | -0.81217700 | 5.07491700  | 0.04430700  |
| C | -2.93364000 | 3.77712400  | 0.11157100  |
| H | -3.50885100 | 4.69640200  | 0.18227000  |
| C | -3.57330600 | 2.55773200  | 0.08680300  |
| C | -2.78722100 | 1.39405000  | 0.00567200  |
| H | 1.08628200  | 6.03346200  | -0.04409600 |
| H | 4.42572300  | 2.59019400  | -0.48885500 |
| H | 3.24222200  | 4.78467700  | -0.27741600 |
| H | -1.37442900 | 6.00153800  | 0.12039300  |
| H | -4.65075300 | 2.47263800  | 0.12199800  |
| N | -1.45766900 | 1.42717400  | -0.04486300 |
| N | 1.26486700  | 1.46341200  | -0.26402200 |
| C | -3.29221900 | -0.01256900 | -0.00466600 |
| C | 3.12117800  | 0.07787000  | -0.59007600 |
| O | 2.34313500  | -0.83843800 | -0.81630500 |
| O | -2.49778600 | -0.94343000 | 0.04341900  |
| N | -4.64186100 | -0.33233000 | -0.06510600 |
| C | -5.11130600 | -1.62710000 | -0.03123500 |
| C | -6.73998400 | -0.15239700 | -0.23567700 |
| C | -6.46696800 | -1.54491200 | -0.13777400 |
| H | -4.42622400 | -2.45569700 | 0.06694700  |
| H | -7.70009400 | 0.33744200  | -0.33704900 |
| H | -7.17316200 | -2.36185800 | -0.14573800 |
| N | 4.47259000  | -0.22600200 | -0.52945700 |
| C | 4.95664800  | -1.51341600 | -0.60503000 |
| C | 6.31032500  | -1.41901500 | -0.48522800 |
| H | 4.27869200  | -2.34651700 | -0.71546100 |
| C | 6.56643000  | -0.02740100 | -0.33812700 |
| H | 7.02529100  | -2.22828300 | -0.48970400 |
| H | 7.52026500  | 0.46954400  | -0.21434100 |
| N | 5.46515000  | 0.68779600  | -0.36142800 |
| N | -5.64673400 | 0.57436200  | -0.19302000 |
| N | 0.18271900  | -3.56912600 | 1.07724200  |
| O | 1.17124600  | -2.98523100 | 0.53738300  |
| O | -0.88579200 | -2.86448900 | 1.14988600  |



|    |             |             |             |
|----|-------------|-------------|-------------|
| O  | 0.23432700  | -4.69736700 | 1.49155500  |
| N  | 0.89906500  | 0.22426400  | 2.67437500  |
| O  | 1.67891400  | -0.45643000 | 1.94010700  |
| O  | -0.28635100 | 0.37689300  | 2.22002900  |
| O  | 1.24774100  | 0.70981700  | 3.72170700  |
| N  | -0.46135500 | -1.31422400 | -2.73796200 |
| O  | -0.54699500 | -0.15072700 | -2.21765900 |
| O  | -0.16400300 | -2.24944000 | -1.92947400 |
| O  | -0.65092400 | -1.50638300 | -3.91280600 |
| Pu | -0.00115500 | -0.86456100 | 0.09704400  |

**AmL<sub>pyrazol</sub>(NO<sub>3</sub>)<sub>3</sub>**

|   |             |             |             |
|---|-------------|-------------|-------------|
| C | -3.43475800 | 2.61704700  | 0.20140600  |
| C | -2.78033900 | 3.83259700  | 0.04840700  |
| C | -1.36450400 | 3.87755400  | -0.03564900 |
| C | -0.66988700 | 2.62436800  | 0.01714400  |
| C | -2.66135600 | 1.42765900  | 0.24979100  |
| C | -0.61941100 | 5.09829200  | -0.15498300 |
| C | 0.78642500  | 2.61319800  | -0.02370800 |
| C | 1.49188600  | 3.85797600  | -0.12219400 |
| C | 0.75722100  | 5.08819300  | -0.19720600 |
| C | 2.90944000  | 3.79623100  | -0.13178100 |
| H | 3.48973800  | 4.72269800  | -0.20742200 |
| C | 3.55659700  | 2.57207500  | -0.03990600 |
| C | 2.77291500  | 1.39033500  | 0.05288800  |
| H | -1.16930900 | 6.04480000  | -0.20287000 |
| H | -4.52060300 | 2.54555700  | 0.27867700  |
| H | -3.35332000 | 4.76575400  | 0.00632300  |
| H | 1.31655200  | 6.02667300  | -0.28094700 |
| H | 4.64407600  | 2.48594200  | -0.03694500 |
| N | 1.41985500  | 1.42186900  | 0.05337700  |
| N | -1.31276000 | 1.44069000  | 0.13708200  |
| C | 3.27638800  | -0.00972400 | 0.15398100  |
| C | -3.16587400 | 0.04051300  | 0.49461500  |
| O | -2.36229400 | -0.87852000 | 0.74621900  |
| O | 2.46615400  | -0.95800100 | 0.24263000  |
| N | 4.64304600  | -0.34047800 | 0.14978200  |
| C | 5.11663400  | -1.64755800 | 0.19788900  |
| C | 6.77464800  | -0.16136600 | 0.12025100  |
| C | 6.49069200  | -1.56227100 | 0.17923700  |
| H | 4.42315400  | -2.48417600 | 0.23271900  |
| H | 7.74742800  | 0.33256500  | 0.09083100  |
| H | 7.19954700  | -2.38822000 | 0.20169600  |
| N | -4.53162700 | -0.28837900 | 0.46806000  |
| C | -5.01299200 | -1.58052900 | 0.64954900  |
| C | -6.38236300 | -1.50235300 | 0.53154500  |
| H | -4.32483200 | -2.40382300 | 0.82623600  |
| C | -6.65482700 | -0.12060300 | 0.27681700  |
| H | -7.09534900 | -2.32145500 | 0.60837000  |
| H | -7.62126500 | 0.36196800  | 0.12069900  |
| N | -5.54789500 | 0.61885700  | 0.23379100  |
| N | 5.67010800  | 0.58312100  | 0.10162600  |
| O | 0.44597900  | -1.21885100 | 4.10419200  |
| N | 0.00460600  | -3.45128700 | -1.22011800 |
| O | -0.84453400 | -3.09235000 | -0.30525000 |

|    |             |             |             |
|----|-------------|-------------|-------------|
| O  | 0.88719100  | -2.54415900 | -1.52777100 |
| O  | -0.02015600 | -4.55391300 | -1.74992900 |
| N  | -0.74788600 | -0.09107000 | -2.73351400 |
| O  | -1.53458700 | -0.77783400 | -1.96679600 |
| O  | 0.37633600  | 0.27506100  | -2.18086100 |
| O  | -1.03394700 | 0.21057400  | -3.88589900 |
| N  | 0.31341800  | -1.08936600 | 2.89336800  |
| O  | 0.27169300  | 0.07645400  | 2.31496400  |
| O  | 0.20239900  | -2.10332900 | 2.08704300  |
| Am | 0.02036900  | -0.82428300 | -0.00061500 |

**CmL<sub>pyrazol(NO<sub>3</sub>)<sub>3</sub></sub>**

|   |             |             |             |
|---|-------------|-------------|-------------|
| C | -3.44870500 | 2.71013200  | 0.23864800  |
| C | -2.78174900 | 3.92683800  | 0.16334600  |
| C | -1.36802400 | 3.95902800  | 0.10048200  |
| C | -0.68122000 | 2.69909400  | 0.11030900  |
| C | -2.68137200 | 1.51807600  | 0.24404600  |
| C | -0.62013100 | 5.18532900  | 0.03010600  |
| C | 0.77858800  | 2.68796700  | 0.06115100  |
| C | 1.48268700  | 3.93611200  | -0.00810300 |
| C | 0.75203900  | 5.17440600  | -0.02460900 |
| C | 2.89652600  | 3.87942100  | -0.05544700 |
| H | 3.47387900  | 4.80917400  | -0.11105900 |
| C | 3.54586300  | 2.65140000  | -0.03168400 |
| C | 2.75946100  | 1.47292700  | 0.04369600  |
| H | -1.17058200 | 6.13274000  | 0.02007600  |
| H | -4.53662000 | 2.64292500  | 0.28354200  |
| H | -3.34528700 | 4.86669100  | 0.15654700  |
| H | 1.31485400  | 6.11298100  | -0.07968200 |
| H | 4.63282200  | 2.56543200  | -0.06729200 |
| N | 1.41360200  | 1.49676400  | 0.09042800  |
| N | -1.33469100 | 1.51695800  | 0.17344900  |
| C | 3.28004400  | 0.05948800  | 0.07965300  |
| C | -3.22575200 | 0.12201100  | 0.39890500  |
| O | -2.46000100 | -0.82144300 | 0.64302000  |
| O | 2.49362400  | -0.89463500 | 0.16671000  |
| N | 4.65015700  | -0.25136500 | 0.01154800  |
| C | 5.13295200  | -1.55751300 | -0.01096000 |
| C | 6.77757100  | -0.05522400 | -0.08573200 |
| C | 6.50349100  | -1.46088700 | -0.07469400 |
| H | 4.44415300  | -2.39895500 | 0.01404600  |
| H | 7.74640000  | 0.44556500  | -0.12926000 |
| H | 7.21801300  | -2.28139700 | -0.11165500 |
| N | -4.59404100 | -0.17548600 | 0.28599200  |
| C | -5.09890800 | -1.47145900 | 0.35468700  |
| C | -6.45896000 | -1.36415700 | 0.17962500  |
| H | -4.42817300 | -2.31531900 | 0.50088600  |
| C | -6.70339600 | 0.03696200  | 0.00913600  |
| H | -7.18451200 | -2.17563300 | 0.16466900  |
| H | -7.65619100 | 0.54271400  | -0.15741400 |
| N | -5.58849500 | 0.76127000  | 0.06801800  |
| N | 5.67052200  | 0.68154500  | -0.03472900 |
| N | -0.17628700 | -3.67731200 | -0.83848600 |
| O | -1.18239500 | -3.06576300 | -0.28797900 |
| O | 0.89229400  | -2.94518200 | -1.00005800 |

|    |             |             |             |
|----|-------------|-------------|-------------|
| O  | -0.22368400 | -4.85197900 | -1.18203900 |
| N  | -0.41836800 | -0.05111700 | -2.77329300 |
| O  | -1.39172200 | -0.50795700 | -2.03985700 |
| O  | 0.74820800  | -0.02750300 | -2.19779700 |
| O  | -0.59041700 | 0.34050800  | -3.92306300 |
| N  | 0.42311000  | -1.18175000 | 2.88516500  |
| O  | 0.14244100  | -0.03603900 | 2.31777400  |
| O  | 0.48222200  | -2.19674000 | 2.08213000  |
| O  | 0.61720300  | -1.27562800 | 4.09250000  |
| Cm | -0.02182800 | -0.90817000 | 0.00764400  |

**EuL<sub>pyrazol</sub>(NO<sub>3</sub>)<sub>3</sub>**

|   |             |             |             |
|---|-------------|-------------|-------------|
| C | -3.42305400 | 2.55318900  | 0.31134200  |
| C | -2.76669000 | 3.76861000  | 0.15479300  |
| C | -1.35585700 | 3.80691800  | 0.04152600  |
| C | -0.66208300 | 2.55249200  | 0.08029500  |
| C | -2.64908000 | 1.36538000  | 0.34021500  |
| C | -0.61618100 | 5.03224300  | -0.10172400 |
| C | 0.79565300  | 2.54395300  | -0.00345500 |
| C | 1.49245800  | 3.79104400  | -0.13020200 |
| C | 0.75459400  | 5.02437500  | -0.18597600 |
| C | 2.90620100  | 3.73923100  | -0.19140400 |
| H | 3.47747900  | 4.66852700  | -0.29592800 |
| C | 3.56379900  | 2.51782900  | -0.11283300 |
| C | 2.78549200  | 1.33845700  | 0.01708800  |
| H | -1.17104100 | 5.97641900  | -0.13905600 |
| H | -4.50797100 | 2.48389400  | 0.40241700  |
| H | -3.33698900 | 4.70397900  | 0.12521200  |
| H | 1.31145200  | 5.96209800  | -0.29215300 |
| H | 4.65142000  | 2.43943500  | -0.13876200 |
| N | 1.43930600  | 1.35738400  | 0.05831500  |
| N | -1.30704100 | 1.37209400  | 0.21626000  |
| C | 3.31322400  | -0.07054800 | 0.10938600  |
| C | -3.17178100 | -0.03336100 | 0.56786300  |
| O | -2.38798700 | -0.96657900 | 0.78006900  |
| O | 2.53246800  | -1.03213000 | 0.13493700  |
| N | 4.68988000  | -0.36200800 | 0.17053700  |
| C | 5.19183900  | -1.65983900 | 0.20564000  |
| C | 6.81307500  | -0.13400000 | 0.29283400  |
| C | 6.56040200  | -1.54337300 | 0.28280200  |
| H | 4.51688800  | -2.51155300 | 0.16742900  |
| H | 7.77354200  | 0.38155100  | 0.34767200  |
| H | 7.28674700  | -2.35317400 | 0.32559500  |
| N | -4.54738000 | -0.33322300 | 0.56122000  |
| C | -5.04252700 | -1.62586000 | 0.70204300  |
| C | -6.41238500 | -1.52581500 | 0.62204400  |
| H | -4.36094500 | -2.46407800 | 0.82654400  |
| C | -6.67228800 | -0.13089200 | 0.43026600  |
| H | -7.13453800 | -2.33822000 | 0.68259400  |
| H | -7.63578600 | 0.36957000  | 0.31819500  |
| N | -5.55743600 | 0.59536700  | 0.38972100  |
| N | 5.69542300  | 0.58580100  | 0.22628400  |
| N | -0.01883100 | -3.57281800 | -1.34325200 |
| O | -0.92111000 | -3.22561300 | -0.48895300 |
| O | 0.90311200  | -2.69130400 | -1.58481300 |

|    |             |             |             |
|----|-------------|-------------|-------------|
| O  | -0.02511700 | -4.67163100 | -1.89564400 |
| N  | -0.86498600 | 0.00337000  | -2.70889500 |
| O  | -1.64918200 | -0.69349000 | -1.95543500 |
| O  | 0.31361900  | 0.25710300  | -2.22490200 |
| O  | -1.20997600 | 0.42046100  | -3.81475000 |
| N  | 0.41725200  | -1.33783900 | 2.81911400  |
| O  | 0.32638500  | -0.14966200 | 2.30974900  |
| O  | 0.28825200  | -2.32368300 | 1.98862100  |
| O  | 0.61465600  | -1.51851600 | 4.02053200  |
| Eu | 0.01264500  | -0.96151100 | -0.06040400 |
